# Supplementary material
Source: publisher figshare collection journal article supplement (https://gsajournals.figshare.com/ndownloader/files/26770220)
Supplement: Supplementary file 1 [file 26770220]

## Sheet: Strains
	Table S3. List of primers used.
	ddPCR assays for copy number measurements
	Gene	Forward primer	Reverse Primer	Probe	Restriction enzyme	Tm (°C)	gDNA (ng/20µL rxn)
1	TUB1	5'-CCAGTCTTATCCAAATCAAAGG-3'	5'-GGATCACACTTGACCATCT-3'	5'-/56FAM/TCCATGAGT/ZEN/CCAACTCTGTGTCA/3IABkFQ/-3'	EcoRI or MseI	57	≥0.005
2	RDN25	5'-TACCTTCGGTGCCCGAGTTGTAAT-3'	5'-ACCCTCTATGACGTCCTGTTCCAA-3'	5'-/5HEX/AACATAGACAAGGAACGGCCC/3BHQ_1/-3'	EcoRI	57	0.005
3	CUP1-1	5'-GAAGGTCATGAGTGCCAATG-3'	5'-GCATTTGTCGTCGCTGTT-3'	5'-/5HEX/AAATCATGTAGCTGCCCAACGG/3BHQ_1/-3'	MseI	57	0.005
4	MATALPHA2	5'-CGCTAATTCTGGAGCGATTG-3'	5'-GCAAAGAACATCGAGAACCC-3'	5'-/5HEX/TCATTAGATTCTCTAGGCCCTTGGT/3BHQ_1/-3'	MseI	57	0.01
5	MATALPHA1	5'-CAGTTTGGCTCCGGTGTAA-3'	5'-GCGCGAAGTAGTCCCATATT-3'	5'-/5HEX/AATGTCTTGTCTTCTCTGCTCGC/3BHQ_1/-3'	MseI	57	0.01
6	leu2-3,112	5'-GACAAGAACACCGCATTTGG-3'	5'-CAGACAAGATAGTGGCGATAGG-3'	5'-/5HEX/CCACGGTTCTGCTCCAGATTT/3BHQ_1/-3'	MseI	57	0.01
	Primers used for RT-ddPCR
	Gene	Forward primer	Reverse Primer	Assay	Restriction enzyme	Tm (°C)	cDNA (RNA equivalent, ng/20µL rxn)
1	CUP1-1	5'-GAAGGTCATGAGTGCCAATG-3'	5'-GCATTTGTCGTCGCTGTT-3'	EvaGreen	MseI	57	0.0005-0.5
2	TUB1	5'-CCAGTCTTATCCAAATCAAAGG-3'	5'-GGATCACACTTGACCATCT-3'	EvaGreen	MseI	57	0.5
3	ACT1	5'-TCGTTCCAATTTACGCTGGTT-3'	5'-CGGCCAAATCGATTCTCAA-3'	EvaGreen	MseI	57	0.5
4	CDC28	5'-GATACATGGTCCATCGGCTGTA-3'	5'-CCACTGAAGATTGGTTTCCTGTT-3'	EvaGreen	MseI	57	0.5
5	MUD1	5'-AAATTTGCCAAGCGGCACTA-3'	5'-CAACTAAAGCCTCATTGCCAAGT-3'	EvaGreen	MseI	57	0.5
6	SER2	5'-CCAAGAGGTCATCGAATTGATTG-3'	5'-CTGTGATCTCGTGCACTTGTTCT-3'	EvaGreen	MseI	57	0.5
7	SPT15	5'-TGCGCTACATGCCCGTAA-3'	5'-CGCATGATGACAGCAGCAA-3'	EvaGreen	MseI	57	0.5
8	TRP1	5'-CGGCTTGCAGAGCACAGA-3'	5'-AGCAAGTCAGCATCGGAATCTAG-3'	EvaGreen	MseI	57	0.5
9	ZWF1	5'-TCGTGTGTACGCAGAGAATGG-3'	5'-TCGTGGCCGAAAGGTTTC-3'	EvaGreen	MseI	57	0.5
	Other primers used
	Purpose	Forward	Reverse	Comments	Plasmids
	MFA1 3xGFP tagging	5'-ATTATCAAAGGTGTCTTCTGGGACCCAGCATGTGTTATTGCTggtgacggtgctggttta-3'	5'-AAGATAAAGGAGGGAGAACAACGTTTTTGTACGCAGAAACTAtcgatgaattcgagctcg-3'	F5 and R3 primers from Sheff et al. (2004) with overhangs homologous to 3' end of MFA1.	pKT128 (3xGFP-HIS5(Sp)) ; pKT209 (3xGFP-URA3(Ca))
	MATα-LEU2 integration	5'-(gene specific sequence)-TTAACCCTCACTAAAGGGAA-3'	5'-(gene specific sequence)-ccgtttctgacagagtaaaatt-3'	Forward and Reverse primers with overhangs homologous to locus of integration.	pRS305 (MATα-LEU2)
	Gene specific sequences used for MATα-LEU2 integration	5'-GGCGTCGCTGAACCATAGCAGGCTAGCAACGGTGCACTTG-3'	5'-CATTGCAATTCGCCAGCAAGCACCCAAGGCCTTTCCGC-3'	RDN25
		5'-TTGTAATTATTGCTCTTCAACGAGGAATTCCTAGTAAGCG-3'	5'-AAAGGGCAGGGACGTAATCAACGCAAGCTGATGACTTG-3'	RDN18
		5'-TTCCGTGAATCATCGAATCTTTGAACGCACATTGCGCCCC-3'	5'-AAATGACGCTCAAACAGGCATGCCCCCTGGAATACCAA-3'	RDN58
		5'-CAAGTCTGAAGAAACCAAGAAGTCATGCTGCTCTGGGAAA-3'	5'-AAATAGTTAGATGAATATATTAAAGACTATTCGTTTCA-3'	CUP1
		5'-GTTCACTCTCGCCCCCAACCTCCTTATCCTTTCTATATTT-3'	5'-TAACAGTAGGGGGAATTTTTTTTTTTACAATATACTTG-3'	TUB1
	PCR amplification of 25S rDNA specific probe for Southern blot in S2 Extended methods	CGAATTCTGCTTCGGTATGA	AAGACCCTGTTGAGCTTGACT	Primers DS66 and DS67	n/a
